# Supplementary material for: Phenotypic differences between highlanders and lowlanders in Papua New Guinea
Source: PLOS journal article supplement (doi:10.1371/journal.pone.0253921), 2021-07-21
Supplement: S10 (10.1371/journal.pone.0253921.s010) [file journal.pone.0253921.s010]

**S1 Table. Number of phenotypic measurements for PNG highlanders and PNG lowlanders.**

|                                                | <b>PNG lowlanders</b> | <b>PNG highlanders</b> |
|------------------------------------------------|-----------------------|------------------------|
|                                                | N= 86                 | N= 70                  |
| age (years) [95%CI]                            | 45.36 [42.26 - 48.46] | 38.50 [34.31 – 42.81]  |
| men                                            | 77                    | 62                     |
| women                                          | 9                     | 8                      |
| <b>Body proportions</b>                        |                       |                        |
| Height                                         | 86                    | 68                     |
| Weight                                         | 86                    | 69                     |
| BMI                                            | 86                    | 68                     |
| Waist circumference                            | 86                    | 69                     |
| <b>Pulmonary function</b>                      |                       |                        |
| Minimal chest depth                            | 73                    | 39                     |
| Maximal chest depth                            | 73                    | 40                     |
| Forced vital capacity (FVC)                    | 28                    | 18                     |
| Forced expiratory volume after 1 second (FEV1) | 28                    | 18                     |
| Peak expiratory flow (PEF)                     | 28                    | 18                     |
| <b>Circulatory system</b>                      |                       |                        |
| Haemoglobin concentration                      | 61                    | 61                     |
| Haemoglobin concentration (corrected*)         | 26                    | 35                     |
| Systolic pressure                              | 86                    | 70                     |
| Diastolic pressure                             | 86                    | 70                     |
| Heart rate                                     | 86                    | 66                     |

\*: People suffering from anaemia were removed from these violin plots, following the World Health Organization (WHO) standard cut-offs (exclusion of non-pregnant lowlander women < 12g/dl, lowlander men <13g/dl, exclusion of non-pregnant highlander women < 13.3g/dl, highlander men <14.3g/dl)[68].
